# Supplementary material for: In situ construction of a heterojunction over the surface of a sandwich structure semiconductor for highly efficient photocatalytic H2 evolution under visible light irradiation
Source: Royal Society of Chemistry journal article supplement (doi:10.1039/c7nr03594b), 2017-01-01
Supplement: c7nr03594b1.pdf [file c7nr03594b1.pdf]

**Electronic Supporting Information**

**For**

**In-situ construction heterojunction over the surface of sandwich  
structure semiconductor for highly efficient photocatalytic H<sub>2</sub> evolution  
under visible light irradiation**

**Zheguan Lin,<sup>a</sup> Jinjin Lin,<sup>a</sup> Lingting Huang,<sup>a</sup> Xiaoyan Zhang,<sup>a</sup> Ying Wang,<sup>a</sup> Zizhong Zhang,<sup>\*a</sup>**

**Huaxiang Lin<sup>a</sup> and Xuxu Wang<sup>\*a</sup>**

<sup>a</sup>State Key Laboratory of Photocatalysis on Energy and Environment, Research Institute of Photocatalysis, College

of Chemistry, Fuzhou University, P. R. China

E-Mail: [z.zhang@fzu.edu.cn](mailto:z.zhang@fzu.edu.cn); [xwang@fzu.edu.cn](mailto:xwang@fzu.edu.cn)

Tel: +86-591-22865832; fax: +86-591-83779251

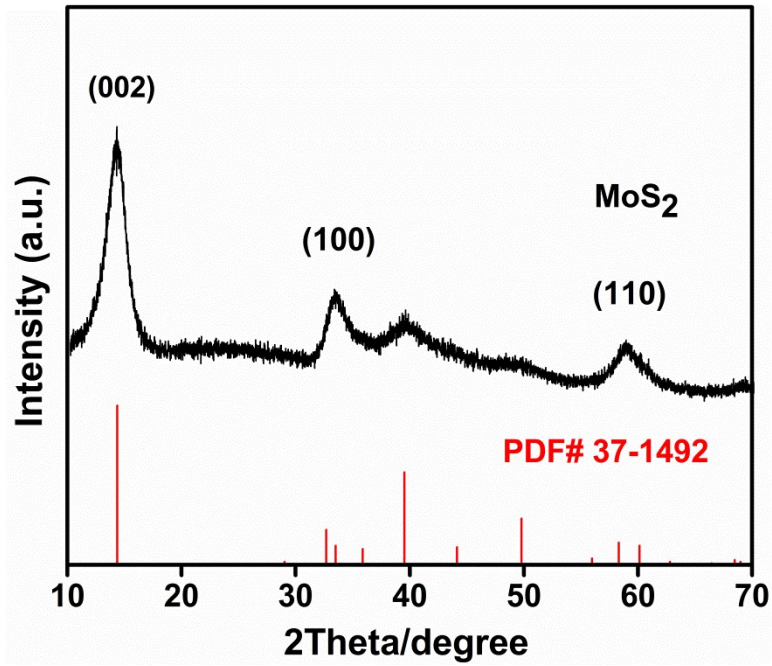

Fig. S1 XRD pattern of the synthesized MoS<sub>2</sub> by calcination in nitrogen atmosphere.

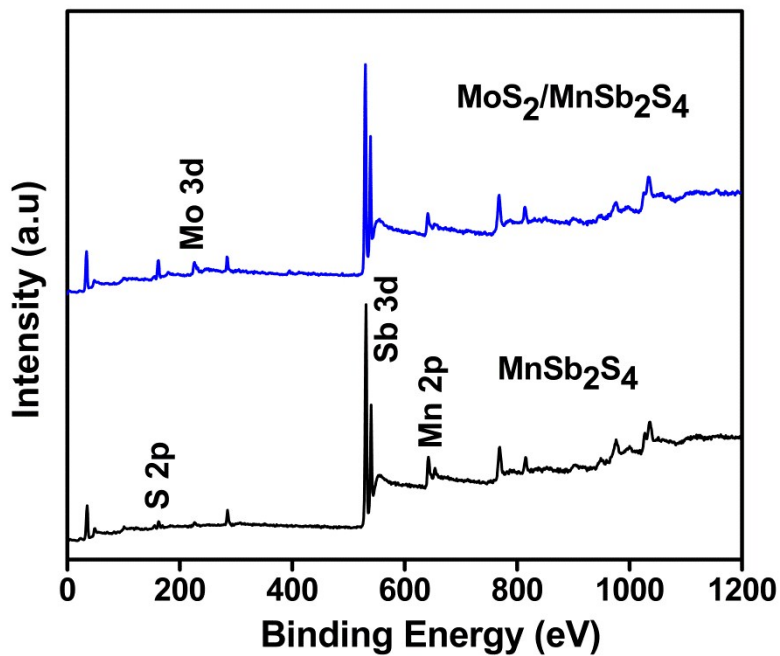

Fig. S2 XPS survey spectrum of MoS<sub>2</sub>/MnSb<sub>2</sub>S<sub>4</sub> composites and pure MnSb<sub>2</sub>S<sub>4</sub>.

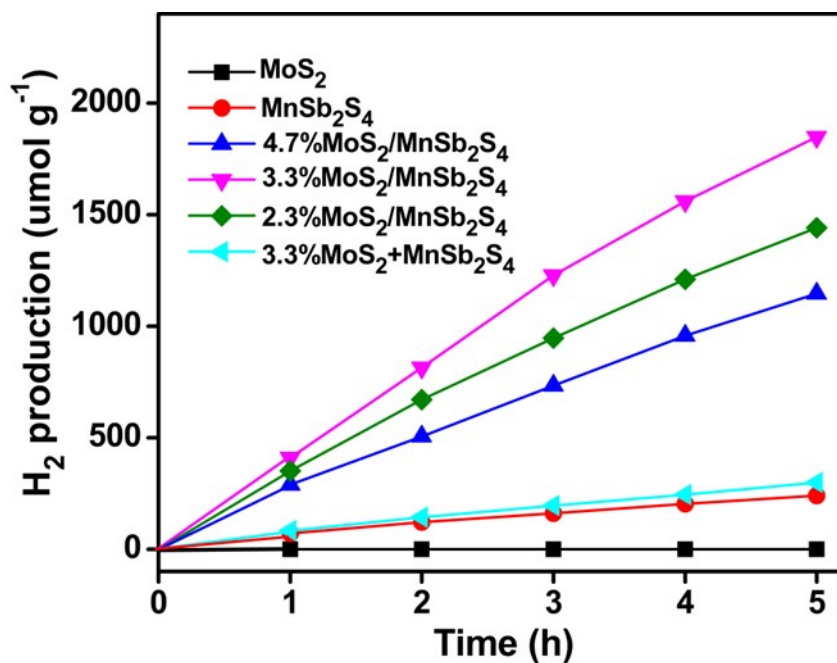

**Fig. S3** The photocatalytic H<sub>2</sub> production for pure MoS<sub>2</sub>, pure MnSb<sub>2</sub>S<sub>4</sub>, 4.7%MoS<sub>2</sub>/MnSb<sub>2</sub>S<sub>4</sub>, 3.3%MoS<sub>2</sub>/MnSb<sub>2</sub>S<sub>4</sub>, 2.3%MoS<sub>2</sub>/MnSb<sub>2</sub>S<sub>4</sub>, and 3.3%MoS<sub>2</sub>+MnSb<sub>2</sub>S<sub>4</sub>.

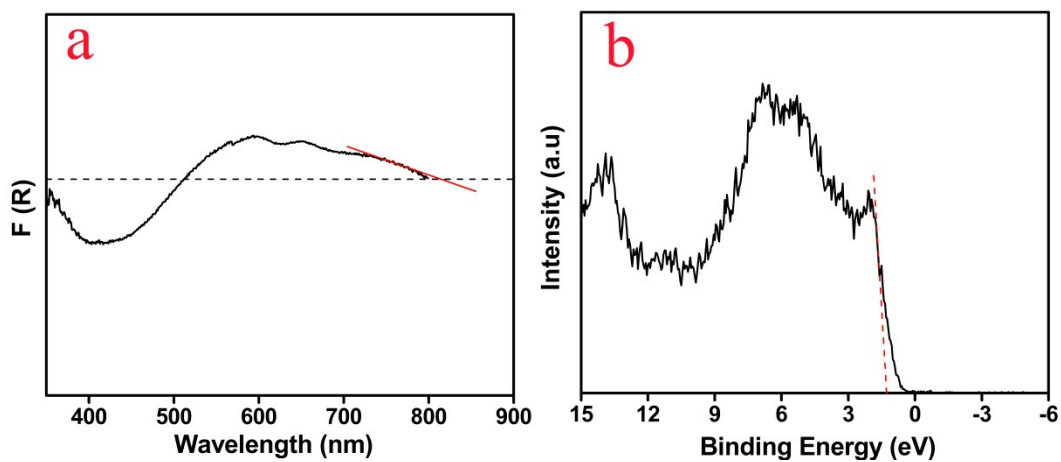

**Fig. S4** (a) UV-Vis diffuse reflectance spectra of few-layer MoS<sub>2</sub>; (b) VB spectrum of pure MoS<sub>2</sub> nanosheets by XPS. The similar result can be found in the literature.<sup>1</sup>

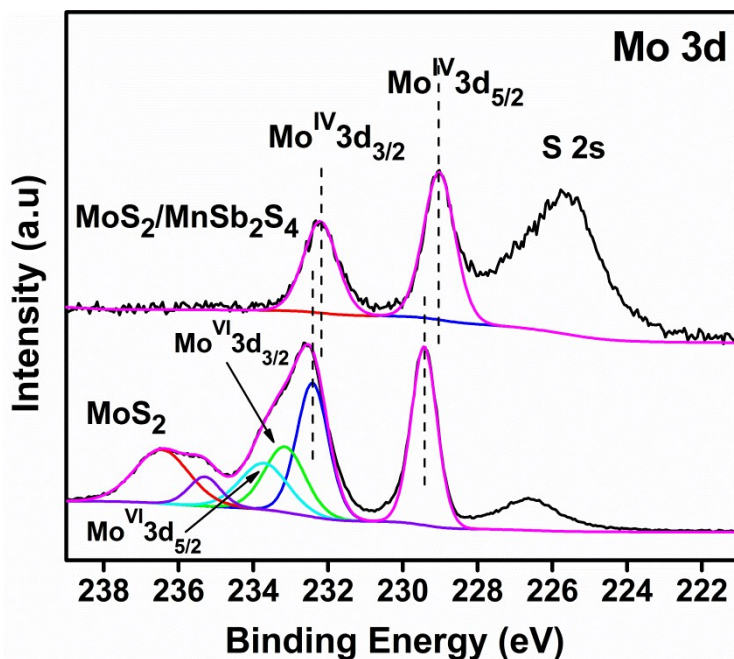

**Fig. S5** Mo 3d XPS of the MoS<sub>2</sub>/MnSb<sub>2</sub>S<sub>4</sub> composites and pure MoS<sub>2</sub>. The peaks at 233.8 and 233.2 eV were assigned to the Mo<sup>VI</sup> 3d<sub>5/2</sub> and Mo<sup>VI</sup> 3d<sub>3/2</sub>, respectively, indicating that Mo<sup>6+</sup> less existed in the pure MoS<sub>2</sub> due to slight surface oxidation upon exposure to air.<sup>2</sup>

**Table S1** Actual loading amounts of MoS<sub>2</sub> on MnSb<sub>2</sub>S<sub>4</sub> in all samples by ICP.

| Samples       | MnSb <sub>2</sub> S <sub>4</sub> | 2.3%MoS <sub>2</sub> /MnSb <sub>2</sub> S <sub>4</sub> | 3.3%MoS <sub>2</sub> /MnSb <sub>2</sub> S <sub>4</sub> | 4.7%MoS <sub>2</sub> /MnSb <sub>2</sub> S <sub>4</sub> |
|---------------|----------------------------------|--------------------------------------------------------|--------------------------------------------------------|--------------------------------------------------------|
| Actual (wt %) | 0                                | 2.34                                                   | 3.33                                                   | 4.72                                                   |

## References

1. M. H. Chiu, C. Zhang, H. W. Shiu, C. P. Chuu, C. H. Chen, C. Y. Chang, C. H. Chen, M. Y. Chou, C. K. Shih and L. J. Li, *Nature communications*, 2015, 6, 7666.
2. X. Hai, K. Chang, H. Pang, M. Li, P. Li, H. Liu, L. Shi and J. Ye, *Journal of the American Chemical Society*, 2016.
